# Supplementary material
Source: publisher figshare collection journal article supplement (https://acs.figshare.com/ndownloader/files/3905716)

## Supporting Information

### Electrochemical Characterization of TiO<sub>2</sub> Blocking Layers for Dye Sensitized Solar Cells

Ladislav Kavan<sup>1</sup>, Nicolas Tetreault<sup>2</sup>, Thomas Moehl<sup>2</sup> and Michael Graetzel<sup>2</sup>

<sup>1</sup>J. Heyrovský Institute of Physical Chemistry, v.v.i., Academy of Sciences of the Czech Republic, Dolejškova 3, CZ-18223 Prague 8, Czech Republic

<sup>2</sup>Laboratory of Photonics and Interfaces, Institute of Chemical Sciences and Engineering, Swiss Federal Institute of Technology, CH-1015 Lausanne, Switzerland

E-mail: kavan@jh-inst.cas.cz

**Figure S1:** Cyclic voltammograms at bare FTO electrode and that covered by TiO<sub>2</sub> film of various thicknesses made by electrochemical deposition. (The virgin film without heat treatment is labeled ‘as rec’). The film which was heat treated in air at 100 °C overnight is labeled ‘100oC’. Scan rate 50 mV/s. The electrolyte solution was 0.5 mM K<sub>4</sub>Fe(CN)<sub>6</sub> + 0.5 mM K<sub>3</sub>Fe(CN)<sub>6</sub> in aqueous 0.5 M KCl, pH 2.5.

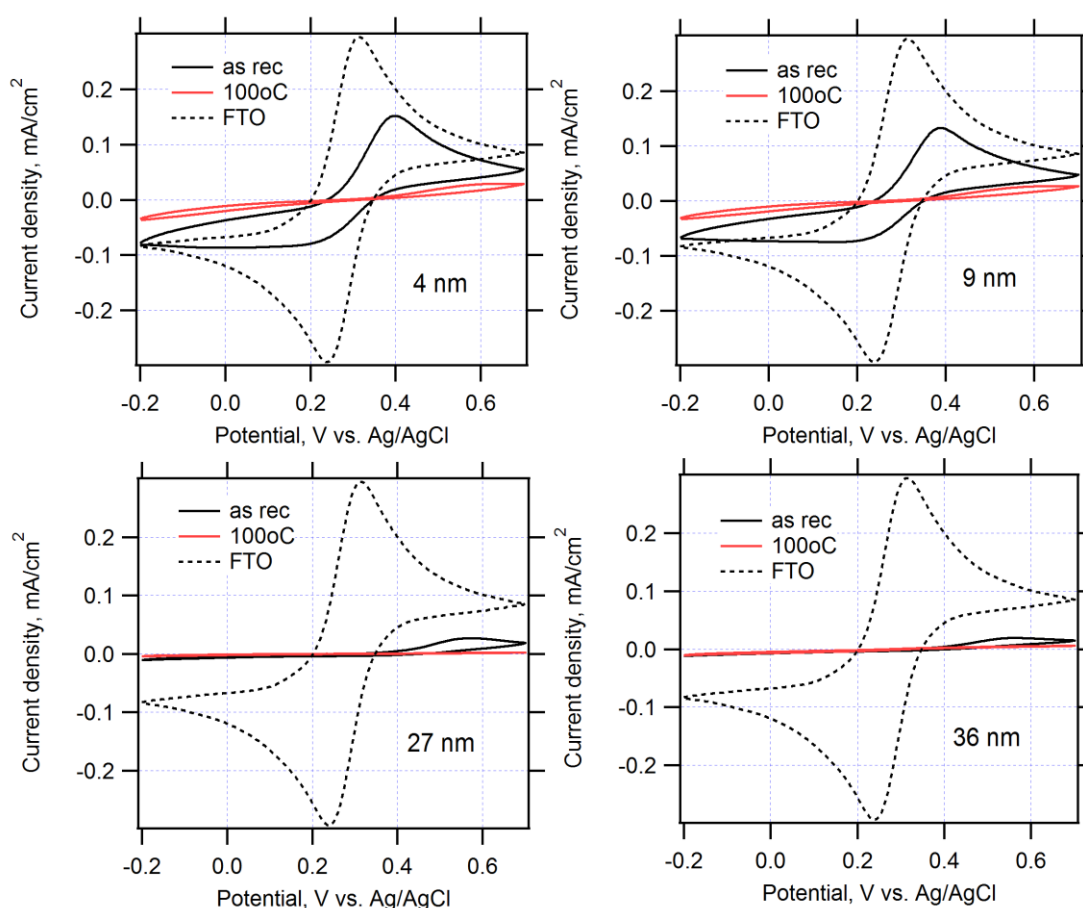

**Figure S2:** Cyclic voltammograms at bare FTO electrode and that covered by ALD made layers of various thicknesses from 1 to 6 nm. The layers were deposited using TDMAT and H<sub>2</sub>O as precursors, substrate temperature 150 °C. Scan rate 50 mV/s. The electrolyte solution was 1 mM spiro-OMeTAD in CH<sub>2</sub>Cl<sub>2</sub> + 0.3 M tetrabutylammonium hexafluorophosphate.

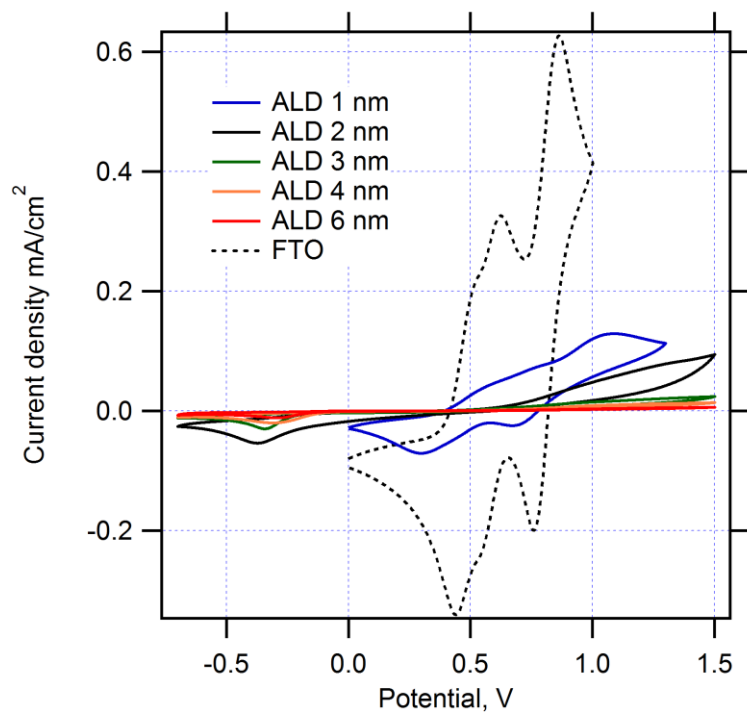

**Figure S3:** Cyclic voltammograms at bare FTO electrode and that covered by ALD made layers of various thicknesses from 1 to 6 nm. The layers were deposited using TDMAT and  $\text{H}_2\text{O}_2$  as precursors, substrate temperature 200 °C. Scan rate 50 mV/s. The electrolyte solution was 1 mM spiro-OMeTAD in  $\text{CH}_2\text{Cl}_2$  + 0.3 M tetrabutylammonium hexafluorophosphate.

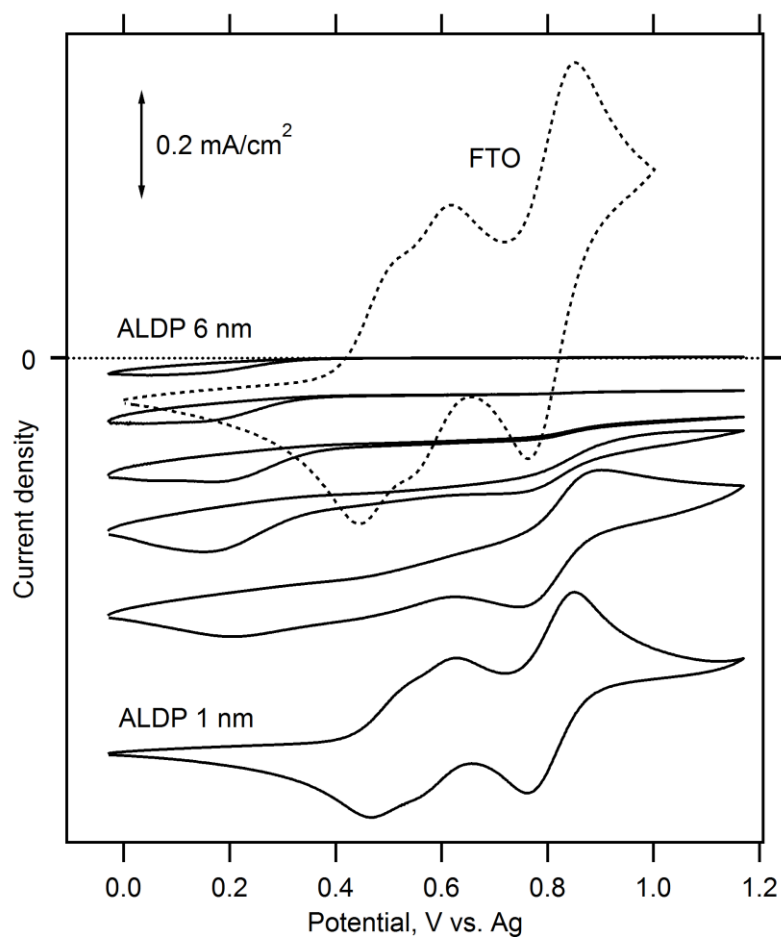

**Figure S4:** Cyclic voltammograms at a non-calcined 60 nm thick  $\text{TiO}_2$  film made by electrochemical deposition. Scan rate 0.1 V/s. The electrolyte solution was aqueous 0.5 M KCl, pH 2.6. Black curve (labeled ‘electrodep.’) is for a virgin electrode; red curve (labeled ‘electrodep. & doped’) is a repeated run of the same electrode, after passing the EIS measurement during which the electrode was subjected to a potential scan from 1.3 V to -0.8 V.

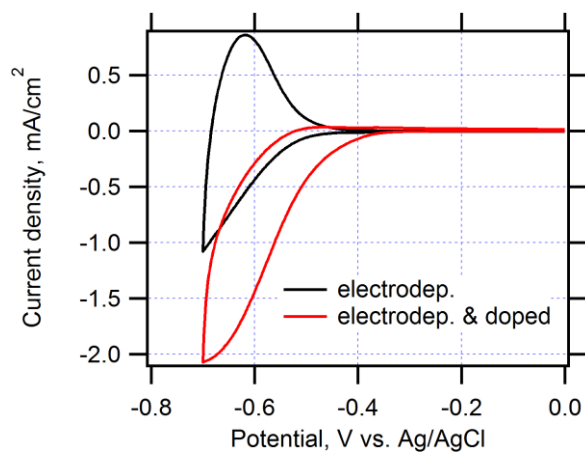

**Figure S5:** Cyclic voltammograms at TiO<sub>2</sub> films made by atomic layer deposition. The layers were deposited using TDMAT and H<sub>2</sub>O as precursors, substrate temperature 150 °C. Scan rate 0.1 V/s. The electrolyte solution was aqueous 0.5 M KCl, pH 2.6. Black curve (labeled ALD) is for a virgin electrode; red curve (labeled 'ALD. & doped') is a repeated run of the same electrode, after passing the EIS measurement during which the electrode was subjected to a potential scan from 1.3 V to -0.8 V.

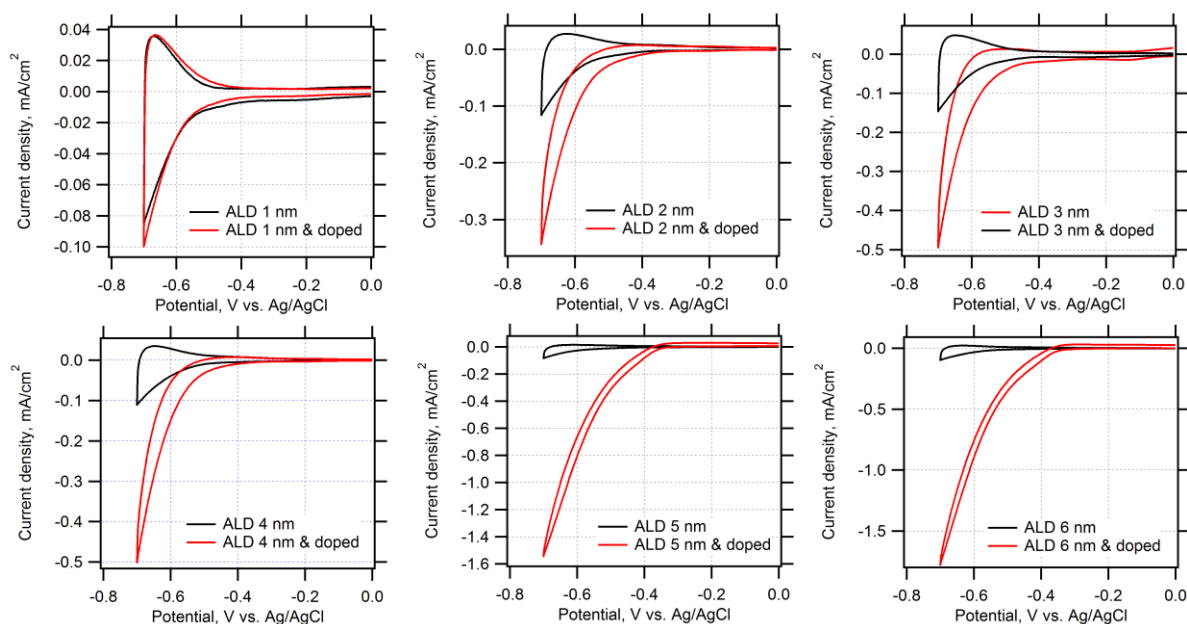

**Figure S6:** Mott-Schottky plot of a FTO electrode covered with TiO<sub>2</sub> film made by atomic layer deposition (ALDP 1 nm to ALDP 7 nm). The layers were deposited using TDMAT and H<sub>2</sub>O<sub>2</sub> as precursors, substrate temperature 200 °C. Electrolyte solution: 0.5 M KCl, pH 2.6.

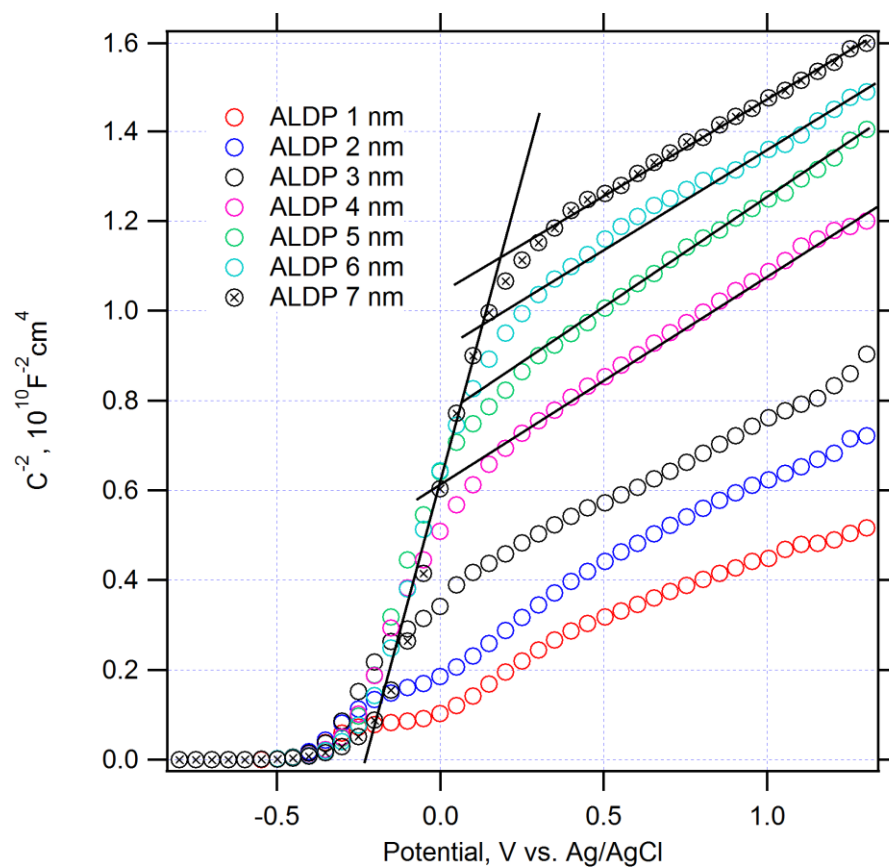

Supplement: Supplementary file 1 [file 3905716]
